# Supplementary material for: BATF relieves hepatic steatosis by inhibiting PD1 and promoting energy metabolism
Source: eLife journal article supplement (doi:10.7554/elife.88521), 2023-07-05
Supplement: fig1-data1 [file Figure 1-Source 1.xlsx]

## Sheet: Sheet1
Fig.1 B	BATF IntDen/β-actin IntDen
CN	0.793704	0.558586	0.901644	0.883069
HFD	2.12039	1.69556	2.86518	4.19147
Fig.1 C
CN	1	0.779165	1.09429	1.20999	0.972655
OA/PA	3.5801	3.34035	3.10588	2.88786	3.61752
Fig.1 D
0	0.471012	0.431955	0.410061	0.949842
1	0.208688	0.949184	0.648635	0.412906	0.224548
2	0.960172	0.538816	0.443345	0.198246	0.523454	0.57595	0.761357	0.396002	0.67442
3	0.563846	0.241166	0.398613	0.763782	0.401483	0.953237	1.24453	0.329229	0.21583	1.15437	0.407051	0.413214	0.206726	0.782813	1.23818	1.17868	0.435374	0.36758
4	0.427263	0.779653	0.476303	0.936165	1.05147	0.627745	0.513859	0.438655	0.288109	0.810539	0.691192	0.950368	1.07716	0.836862	0.574273	0.428556
5	1.34193	0.641243	1.08732	0.519862	0.757631	1.11817	0.871049	0.507706	0.944748	0.67792	0.823923	0.433566	0.532109	0.891004	0.591724	0.747664	0.38338	0.650012
6	0.585421	0.638759	1.241	1.31174	0.609989	1.48292	0.685559
Fig.1 E
NC	286.777	278.5	209.402	224.75	253.394
siBATF	244.241	265.474	246.956	260.633	224.802
Fig.1 F
CN	1.23608	0.763923
BATF	35.247	45.4967
Fig.1 H
CN	274.019	254.086	227.912	284.732
BATF	185.715	211.735	202.138	176.034
Fig.1 J
CN	231.809	250.922	233.581
BATF	210.81	208.509	224.408
Fig.1 L
OAPA+CN virus	253.7	264.776	233.78
OAPA+BATF virus	201.994	198.417	207.802
