# Supplementary material for: BATF relieves hepatic steatosis by inhibiting PD1 and promoting energy metabolism
Source: eLife journal article supplement (doi:10.7554/elife.88521), 2023-07-05
Supplement: fig1-figsupp1-data1 [file Figure 1figure supplement 1source data 1.xlsx]

## Sheet: Sheet1
Fig.S1 A
CN	134.473	138.619	143.464
OAPA	263.655	282.643	278.892
Fig.S1 B
NC	100	140.445	74.7425
siBATF	63.728	45.5335	60.4997	50.1736
Fig.S1 C
NC	286.777	278.5	209.402	224.75	253.394
siBATF	244.241	265.474	246.956	260.633	224.802
Fig.S1 D
CN	217.436	272.684	235.715
BATF	186.091	121.528	111.252
