# Supplementary material for: BATF relieves hepatic steatosis by inhibiting PD1 and promoting energy metabolism
Source: eLife journal article supplement (doi:10.7554/elife.88521), 2023-07-05
Supplement: fig2-data1 [file Figure 2-source data 1.xlsx]

## Sheet: Sheet1
Fig.2 C
HFD-CN	0.372318	0.252858	0.293313	0.364376
HFD-BATF	0.544292	0.912234	0.996603	1.28846
Fig.2 E	HFD-CN			HFD-BATF
Heart	3.51751	3.20998	4.33514	4.03095	4.21517	3.53242
Muscle	0.95827	0.976705	1.01541	0.993569	0.971506	1.01045
Fat	0.613387	0.585294	0.615879	0.560448	0.582266	0.537393
Spleen	0.81129	0.807284	0.804616	0.788978	0.764058	0.769808
Liver	1.25697	1.17516	1.12716	2.34379	2.5159	2.50599
Fig.2 F
HFD-BATF										ND-CN										HFD-CN										ND-BATF
23.3		23.1	22.48	22.58	23.95	21.97	21.87	23.2	21.28	25.6	24.4	22.25	19.64	21.4	23.1	21.23	23.4	21.31	22.98	22.4	25.05	23.75	25.05	23.17	24.42	20.89	22.69	24.09	22.26	25.74	23.52	22.32	22.66	21.43	23.5	21.28	22.05	21.78	23.17
25.64		22.76	23.07	23.36	24.55	23.04	23.01	23.63	21.46	25.77	23.98	22.92	20.77	22.98	22.85	21.76	24.2	21.66	23.22	22.68	22.48	24.84	25.5	23.72	24.46	21.15	23.66	25.05	22.65	26.1	23.92	23.73	23.47	21.75	24.39	22.48	23.07	22.38	23.71
24.95		23.5	24.46	23.77	27.13	25.18	25.58	26.22	23.07	27.22	24.8	23.55	22.22	23.36	24.14	23.02	25.13	22.4	23.82	24.82	25.97	26.36	27.99	25.94	28.33	24.52	25.75	28.01	25.15	28.02	24.92	24.58	24.44	22.52	25.3	22.76	23.41	22.91	24.61
25.93		25.32	26.57	26.42	29.88	25.55	26.06	27.08	23.34	28.83	26.35	25.44	22.99	24.32	25.52	23.23	24.76	22.97	24.17	26.96	28.11	27.23	28.67	27.02	31.22	26.52	27.16	30.71	27.04	28.17	25.8	24.59	26.61	22.86	27.5	23.63	24.73	24.41	25.3
27.09		26.64	27.82	27.55	32.57	27.4	27.32	29.72	24.54	28.47	25.73	25.54	23.02	24.67	24.58	23.37	25.29	23.22	23.94	29.02	29.29	28.05	30.97	28.34	33.92	28.44	28.92	32.23	30.16	28.18	26.04	24.26	25.95	22.7	26.69	23.82	24.9	24.11	26.09
28.57		29.5	29.64	29.64	34.5	30.93	28.69	32.37	25.82	29.15	27.02	26.36	23.09	25.01	27.32	24.25	26.1	24.36	24.86	31.58	31.78	30.71	33.42	29.45	37.26	30.39	30.52	34.44	32.73	29.84	26.33	24.26	26.52	24.11	26.68	24.36	26.24	25.92	26.42
29.98		31.88	29.89	31.11	35.75	33.23	30.4	33.2	26.65	30.27	27.08	26.71	23.24	25.58	27.53	25.41	27.75	25.87	26.06	33.36	33.18	31.86	34.93	28.95	38.2	34.25	32.13	36.9	35.01	30.75	26.16	24.71	27.25	24.67	29.49	24.85	26.92	28.36	28.92
31.83		34.33	30.98	32.52	38.04	35.33	32.42	35.75	28.02	29.75	28.5	27.33	23.49	27.43	27.79	26.25	27.98	25.78	26.03	35.36	35.28	34.5	35.8	31.05	41.96	36.2	34.33	39.16	38.36	30.24	25.31	24.66	27.28	23.46	28.83	25.52	27.03	26.78	28.05
31.63		35.18	30.76	33.37	38.76	36.15	32.71	36.42	28.23	30.86	29.36	28.4	23.89	26.86	28.88	26.15	28.67	27.25	26.73	36.42	36.46	35.84	36.37	32.68	43.52	37.68	35.68	40.67	40.18	31.39	27.42	26.51	27.87	24.45	30.91	25.39	28.98	29.88	30.05
33.16		32.37	30.41	31.55	39.57	32.75	35.11	34.98	29.51	31.62	28.84	29.07	23.76	25.78	29.84	25.33	29.32	26.99	26.33	32.38	37.44	36.81	37.7	33.65	44.67	33.98	36.2	36.68	36.13	31.13	27.77	27.26	27	24.99	31.51	27.42	29.8	28.8	30.04
33.79		33.77	31.96	32.84	41.29	35.72	36.66	37.31	29.63	31.22	28.66	30	25.96	26.57	29.72	24.99	29.1	28.26	25.98	35.21	37.48	36.45		34.54	45.71	37.24	36.51	37.78	38.85	31.32	27.4	26.69	26.64	25.01	30.39	25.11	28.42	28.13	30.84
33.53		34.43	31.83	33.34	41.53	36.35	36.62	38.03	29.61	31.45	29.72	31.03	26.34	26.93	30.26	26.21	30.18	28.89	26.74	36.42	38.24	37.75	38.19	35.01	45.88	37.39	37.73	40.43	38.19	32.3	27.94	28.17	27.17	25.66	30.74	25	29.46	27.17	30.56
Fig.2 G
HFD-BATF										ND-CN										HFD-CN										ND-BATF
12.21		12.615	10.587	9.841		10.014	7.883	8.651	7.434	6.813	10.566	11.402	10.234	11.285	5.026	3.759	6.171	6.068	4.852	10.652	8.156	5.406	3.912	6.729	9.681	9.698	7.245	10.98	7.363	5.423	6.271	13.073	8.65	11.078	8.694	8.731	13.138	8.77	10.419
7.005		10.224	9.215	9.521		9.397	7.679	7.63	6.44	5.429	9.429	10.681	11.69	11.558	5.847	3.911	7.041	7.041	5.637	11.226	8.888	6.594	4.6	7.728	8.765	8.846	8.597	10.886	7.325	4.989	5.715	14.168	7.742	10.989	9.914	8.007	12.87	8.15	8.718
8.85		13.285	15.875	11.119		13.562	11.4	13.192	10.013	7.223	9.875	12.408	12.142	11.682	7.722	6.273	9.499	9.978	7.196	17.107	16.619	10.266	9.411	10.759	16.092	15.371	12.334	17.147	12.895	6.87	8.126	13.946	8.359	12.518	12.3	8.735	14.007	10.563	9.76
9.772		16.702	19.981	14.561		15.894	12.345	15.451	12.009	7.863	7.871	13.817	10.47	10.995	8.252	7.779	9.523	10.091	8.113	23.042	20.911	11.649	14.05	16.221	21.348	19.834	14.013	21.876	15.888	5.786	7.388	12.224	8.339	11.522	15.033	8.447	13.162	10.565	9.202
10.764		20.263	19.543	16.091		20.471	15.161	21.299	15.636	6.684	5.954	12.905	9.027	9.7	8.893	8.618	10.589	9.858	7.256	25.603	22.653	13.34	20.449	19.28	25.024	23.238	17.445	25.116	20.129	5.366	6.375	10.853	6.046	9.11	15.028	8.027	12.177	10.066	10.418
12.118		24.363	21.181	20.715		25.984	16.961	25.771	17.595	8.593	6.843	14.181	10.797	10.756	14.264	11.715	12.548	12.106	8.367	28.816	25.538	18.307	24.231	21.025	29.879	26.894	20.387	27.901	24.641	7.363	7.235	11.331	6.55	10	15.611	8.391	13.285	12.701	12.88
14.576		27.622	22.004	22.674		27.716	19.276	28.952	19.208	7.466	5.336	14.639	11.614	10.997	15.459	12.582	15.596	14.233	11.351	31.136	29.256	21.685	27.286	21.264	32.005	33.708	22.067	29.957	27.575	7.525	7.519	11.109	6.844	9.603	18.749	8.849	14.681	17.338	17.403
16.478		30.883	22.857	26.648		31.845	23.313	29.516	20.121	7.97	7.818	15.95	11.332	12.705	15.685	14.122	14.85	13.6	11.798	32.868	30.371	24.162	28.257	22.915	36.444	35.138	25.508	32.572	31.872	7.431	7.811	10.77	7.595	8.926	20.545	10.27	14.772	16.811	16.916
18.65		35.267	23.622	29.766		36.484	26.133	32.416	21.881	8.95	8.007	19.521	13.977	14.561	17.105	13.95	18.294	18.018	12.147	34.791	32.74	27.028	30.157	26.68	39.637	37.988	29.016	35.845	35.898	11.061	12.389	15.221	8.558	12.642	23.623	10.973	17.553	20.686	18.696
22.425		30.553	22.164	24.926		29.905	30.308	26.812	20.108	7.299	5.218	19.938	13.005	10.477	15.221	10.415	17.667	16.903	8.564	28.348	33.616	27.226	31.775	26.844	39.234	31.904	29.691	30.701	31.162	9.036	9.071	16.555	8.896	12.825	23.424	8.793	15.926	16.382	18.469
20.441		30.281	23.304	25.35		31.962	29.1	30.169	23.085	8.78	7.104	21.933	17.685	12.962	17.227	12.369	17.347	20.004	11.447	31.534	32.895	27.646	36.022	29.861	39.278	34.433	28.973	29.627	32.257	9.438	8.956	15.485	10.338	12.759	21.589	9.801	16.685	17.145	18.619
21.357		31.473	24.122	26.353		33.348	29.582	32.519	22.837	9.863	8.674	23.223	18.652	13.353	18.992	13.758	18.787	20.678	11.533	32.886	32.743	28.922	31.328	29.897	39.102	35.304	29.568	31.657	31.118	11.26	10.576	19.045	11.509	14.517	22.889	11.196	18.014	15.16	20.281
Fig.2 K
HFD-CN	53.092	52.596	55.221
HFD-BATF	37.908	37.698	35.523
Fig.2 L
ND-CN	100.184	105.867	109.347	144.006	168.675	136.094	140.612	185.035	99.9461
ND-BATF	119.333	138.988	165.149	84.8946	127.179	152.12	106.698	99.0153	101.52	107.535
HFD-CN	206.231	223.823	214.445	309.017	201.762	180.083	255.221	178.299
HFD-BATF	128.625	172.45	141.213	132.147	157.566	160.802	142.524	126.13	157.676	127.563
Fig.2 M
HFD-CN	212.557	152.127	201.013	222.31	211.905	247.821	187.023	179.184	158.535	183.264
HFD-BATF	128.116	167.291	142.115	135.505	159.809	216.242	159.325	153.624	161.191	133.442
