# Supplementary material for: BATF relieves hepatic steatosis by inhibiting PD1 and promoting energy metabolism
Source: eLife journal article supplement (doi:10.7554/elife.88521), 2023-07-05
Supplement: fig3-data1 [file Figure 3source data 1.xlsx]

## Sheet: Sheet1
Fig.3 A
HFD-CN	42.7074	88.7738	74.192	48.308	45.7348	50.8308	58.8029	34.7858
HFD-BATF	23.4332	46.7944	30.7494	33.6758	34.7354	20.9105	21.4655
Fig.3 B
HFD-CN	44.7969	57.218	52.7697	45.3786	55.1307	46.3709	43.565
HFD-BATF	36.4819	43.9072	40.6223	39.2536	43.8388	42.3332	39.9379
Fig.3 C	HFD-CN								HFD-BATF
Fasn	1.07822	1.5786	1.01301	1.36476	1.01301	0.726305			0.800319	0.751918	0.757148	0.309637	1.11624	1.06337
Srebp1	0.576044	0.948849	1.60687	1.59577	1.93757	0.418776	0.240524	0.675604	1.3796	2.68375	2.33634	1.30518	2.46955	0.935785
Gpam	0.712054	0.946096	1.10195	2.25021	1.44399	0.368582	0.460113	0.717007	0.476338	2.44538	1.13293	0.550975	2.67597	0.624191
Acc1	0.581799	1.29109	1.34592	1.68015	1.83858	0.502987	0.286895	0.472568	0.958329	2.45989	2.24792	0.912941	3.20116	0.69188
Fig.3 D	HFD-CN								HFD-BATF
Ampkα1	0.658926	1.15524	1.34554	0.343454	0.186622	0.425783			0.83404	3.2675	1.63375	1.60013	3.29023	2.24729	0.839841
Aco	0.699101	0.630065	1.50898	0.412816	0.225871	0.540952			3.06008	2.07566	1.40793	3.08137	4.26804	1.26889
Acox1	0.48299	0.420467	1.74118	0.233269	0.121587	0.489732			5.73608	3.7323	1.50531	6.40885	5.42666	0.895065
Bcl2	0.938659	1.12402	1.21308	1.08574	0.632297	0.456496	0.857776		1.29116	1.87732	1.91677	1.7037	2.11209	1.41291
Cpt1	0.595944	0.494228	1.62817	0.248833	0.138049	0.567719			3.81914	3.81914	1.80656	5.28993	4.38704	0.75432
Hsl	0.459966	0.876363	1.43356	0.438181	0.271608	0.742056			0.456789	2.24949	2.80811	0.870309	2.37775	2.17287
Acc2	0.954548	1.57231	1.34061	1.45689	1.01599	0.451529	0.504487	0.70363	0.473977	0.708525	1.02306	1.11179	2.53659	0.567578
Atgl	0.632554	1.17223	1.3844	0.999488	0.701863	0.606787	0.558358		0.926114	1.54677	2.88638	1.65779	1.44319	1.49408
Fig.3 E
CN	3.31581	3.7898	1.79134	5.01685
BATF	11.7088	10.3734	7.70521	8.40719
Fig.3 F
CN	1.37579	1.32566	1.53227	1.37683
BATF	1.90118	1.6885	1.66297	1.76004
Fig.3 G
Time (minutes)	CN				BATF
1.37774	828.6	883.822	705.99	712.831	879.939	832.248	871.571	797.398
9.92266	811.954	852.349	694.156	701.891	863.926	819.543	852.551	789.413
18.4801	804.8	854.851	685.488	693.314	853.587	807.139	841.821	783.754
27.1386	636.028	652.237	511.706	527.882	664.6	636.619	646.667	623.663
35.6918	638.2	650.53	506.716	512.543	599.423	579.009	588.908	601.35
44.2334	636.573	656.677	509.713	511.49	598.344	584.69	586.047	601.71
52.8901	1081.73	1129.41	845.609	976.467	1367.85	1217.9	1305.87	1060.02
61.429	952.985	1006.19	763.758	860.548	1195.15	1066.44	1137.07	949.714
69.9763	917.349	969.08	729.759	788.58	1126.14	1012.92	1038.24	899.347
78.615	560.798	588.505	450.421	454.232	548.889	508.956	520.433	538.993
87.1906	566.888	591.035	439.892	449.632	545.569	503.301	513.739	536.763
95.7384	561.961	588.051	434.137	437.168	532.776	499.989	503.069	525.084
Fig.3 H
	CN				BATF
Basal Respiration	242.84	266.8	251.35	256.15	320.81	307.15	338.75	258.67
Maximal Respiration	519.77	541.36	411.47	539.3	835.08	717.91	802.8	534.93
Proton Leak	76.24	62.48	72.58	75.37	66.65	79.02	85.84	76.27
ATP Production	166.6	204.32	178.77	180.77	254.16	228.13	252.91	182.4
Coupling Efficiency	68.61	76.58	71.12	70.57	79.23	74.27	74.66	70.52
