# Supplementary material for: BATF relieves hepatic steatosis by inhibiting PD1 and promoting energy metabolism
Source: eLife journal article supplement (doi:10.7554/elife.88521), 2023-07-05
Supplement: fig4-data1 [file Figure 4source data 1.xlsx]

## Sheet: Sheet1
Fig.4 C
ND-CN	0.023097	0.016661	0.041328	0.025759	0.021682	0.031904	0.022542	0.033199	0.032936	0.020936
ND-BATF	0.019913	0.020147	0.034107	0.02259	0.023174	0.037549	0.018116	0.033611	0.026816	0.032205
HFD-CN	0.052764	0.05238	0.054536	0.050242	0.049263	0.065131	0.058038	0.046787	0.055018	0.0502
HFD-BATF	0.034587	0.057176	0.049985	0.041893	0.041782	0.04926	0.046583	0.049331	0.043397	0.034613
Fig.4 E
ND-CN	0.016265	0.013601	0.021477	0.026144	0.020935	0.023264	0.017101	0.024145	0.02768	0.015988
ND-BATF	0.014312	0.015018	0.021408	0.017319	0.021995	0.025692	0.017311	0.022176	0.019367	0.02324
HFD-CN	0.044389	0.037756	0.030778	0.03842	0.037758	0.048737	0.039237	0.034149	0.036169	0.040053
HFD-BATF	0.0179	0.041332	0.03845	0.030381	0.030108	0.034589	0.027313	0.033014	0.028787
Fig.4 G
HFD-CN	167.684	129.233	168.398	181.174	137.315	184.296	120.548	139.484	166.651	173.557	145.85	151.975	184.703	127.449	133.011	127.449	105.399	126.651	133.911	110.815	184.052	182.393	213.979	104.685	193.029	187.266	113.525	114.053	155.079	188.484	188.723	127.802	142.492	173.492	197.564	159.752	148.173	168.019	180.177	153.449	151.306	168.019	205.333	136.986	168.198	154.23	189.754	157.027	139.511
HFD-BATF	100.523	104.685	141.006	106.078	129.462	147.934	90.683	146.632	131.228	164.363	155.777	132.97	109.589	89.049	108.133	99.924	119.282	102.69	108.641	145.432	152.782	159.575	89.199	71.955	130.309	162.895	84.018	125.537	132.631	125.297	126.556	115.344	92.432	123.69	133.646	138.247	88.278	87.309	155.197	146.404	142.477	132.14	82.698	108.18	102.43	158.946	134.579	104.812	110.151
Fig.4 H
HFD-CN	6092.45	14593.5	23404	17072.2	15624.4	10660.3	14009.7	14164	10820.5	9204.98	12677.8	10429.3	23590	12954.7	13569.4	19772.7	12058.1	12561	5596.21	21233.9	19509.2	6199.2	8971.46	23504.9	16093.9	19384.9	16562.6	8896.4	11677.8	9759.6	16663.5	13832.9	12552.7	17139.8	14830.4	7712.1	21481.6	16766.1	13378.4	16204	16792	18174.8	13353.4	20820.2	16397.5	8365.13	13850.4	23815.2	16655.2
HFD-BATF	12089	7162.49	6456.08	6589.52	7991.49	9325.91	15775.3	11496	11068.2	14632.7	13832.9	8757.11	10729.5	13716.1	6179.19	13791.2	9300.89	11783.7	7426.87	11316.7	4329.35	3461.98	9905.55	8884.72	11979.7	9419.32	14588.5	10478.5	10481	8857.2	6640.4	9421.82	8667.04	8035.7	10185.8	10676.2	9193.3	7460.23	10811.3	6771.34	13179	7558.64	11305.9	12606.9	9409.31	10177.4	5921.48	8125.77	7456.89
Fig.4 J
HFD-CN	136.156	151.994	130.245	125.537	125.961	125.656	138.199	170.842	97.559	111.789	127.187	102.299	74.17	97.096	123.69	101.036	123.19	87.69	106.266	117.918	90.443	182.658	140.081	113.213	179.637	154.389	125.961	98.782	113.918	67.949	113.61	95.258	131.266	123.135	121.045	128.245	168.037	122.102	140.829	108.518	126.674	123.19	115.01	137.23	135.898	141.491	160.481	122.102	77.878
HFD-BATF	122.388	137.096	91.324	103.901	125.337	97.422	98.189	70.005	87.309	85.553	75.969	82.374	101.842	108.18	109.009	133.945	96.51	113.242	126.146	97.422	130.501	76.276	84.335	112.147	76.298	73.967	89.218	70.503	119.561	85.611	76.298	113.213	73.718	129.152	103.014	77.77	99.371	94.29	121.43	125.191	120.174	78.539	102.038	86.618	96.873	86.155	158.862	74.953	109.893
Fig.4 K
HFD-CN	9478.53	7328.45	15143.1	4793.06	6522.8	5552.01	10009.8	9375.12	6918.95	9845.5	5136.67	3777.24	8618.67	9860.51	13798.7	13586.9	8670.38	9773.77	9792.96	19837	10639.5	9118.24	11546	14039.7	10684.5	11632.8	9316.74	7042.39	9599.47	9487.71	10088.2	9543.59	8918.91	6228.39	11642	14501	13148.2	11473.5	9292.55	12028.9	15047.2	10335.1	14365.8	8148.29	10843	8298.41	10617	7011.53	6635.39
HFD-BATF	8865.54	9147.43	6240.9	4110.01	4007.42	6253.41	2483.68	3855.63	5179.21	6558.66	3934.03	7947.29	10752.1	7102.44	3667.15	4766.37	3361.9	6563.67	6505.29	5291.8	3841.45	5006.57	5210.9	2029.98	2690.52	8589.48	3643.79	10834.6	4026.61	2583.77	5727.99	4009.93	5974.85	7889.74	4213.42	4247.62	6994.02	4731.34	8232.52	4490.31	5672.94	8877.21	7838.87	10477.7	6635.39	8051.54	3407.77	11899.7	7065.74
Fig.4 L
CN	185.434	223.275	243.292	195.888	245.091
BATF	227.768	211.027	217.284	238.102	203.859
Fig.4 M
HEPG2-CN culture medium	237.986	260.734	260.134
HEPG2-BATF culture medium	209.514	224.402	224.537	231.711
Fig.4 N
ND-CN	1.35882	0.819239	1.08851	0.354131	2.9127	0.435987	0.387524	2.23823
HFD-CN	0.30616	0.319161	0.551853	0.141842	0.164067	0.091655	0.175843
HFD-BATF	0.351685	0.563449	1.05143	2.10287	2.41556	0.941059	0.514897
[truncated: 69 more columns]
