# Supplementary material for: BATF relieves hepatic steatosis by inhibiting PD1 and promoting energy metabolism
Source: eLife journal article supplement (doi:10.7554/elife.88521), 2023-07-05
Supplement: fig5-data1 [file Figure 5source data 1.xlsx]

## Sheet: Sheet1
Fig.5 A
ND-CN	0.158008	0.193187	0.280888	0.109479	0.375687
HFD-CN	0.822707	1.78813	0.389164	0.485684	1.58579
HFD-BATF	0.311748	0.327247	0.133828	0.289679	0.339099
Fig.5 B
CN	0.89777	0.989257	1.11297
BATF	0.53013	0.498069	0.560357
Fig.5 D
NC	233.659	223.407	226.613
PD1	280.922	264.172	266.197
Fig.5 E
CN	226.185	258.319	251.97
PD1antibody	183.57	186.185	198.786
BATF+PD1antibody	220.45	196.315	198.804
Fig.5 F
NC	257.097	237.917	248.137	296.849
BATF	185.581	211.582	201.993	175.907
BATF+PD1	278.275	266.357	264.961	252.47
Fig.5 G
control	0.225806	0.138889	-0.02941
pcDNA3.1-+PD1 5'UTR-F-Luc	1.5	1.53061	1.73134	1.19753	1.64706
BATF+PD1 5'RTR-F-Luc	1.25455	0.78481	0.892308	0.984615	1.19672
