# Supplementary material for: BATF relieves hepatic steatosis by inhibiting PD1 and promoting energy metabolism
Source: eLife journal article supplement (doi:10.7554/elife.88521), 2023-07-05
Supplement: fig6-data1 [file Figure 6source data 1.xlsx]

## Sheet: Sheet1
Fig.6 A
	HFD-CN					HFD-PD1 antibody
1	18.79	18.85	19	18.99	18	17.73	18.93	18.88	18.69	19.31	18.22
2	18.52	19.87	19.98	20.01	19.52	19.98	18.61	17.83	20.01	19.52	21.5
3	18.41	20.99	20.26	20.38	20.67	16.76	20.84	21.01	20.81	21.21	18.32
4	19.14	20.35	20.5	21.32	21.66	18.38	20.94	21.29	21.38	21.41	19.6
5	22.21	21.24	23.78	25.43	24.32	20.27	22.85	24.75	23.98	23.13	22.54
6	23.13	22.29	25	27.21	25.02	21.99	22.84	25.79	24.31	24.4	22.56
7	23.84	23.95	27.47	27.88	25.8	21.57	23.57	26.21	25.46	24.71	23.52
8	25.37	25.59	28.1	29.75	27.19	23.67	23.45	26.32	25.56	25.78	24.86
9	27.42	26.84	29.67	29.74	27.18	25.78	24.87	26.74	26.07	26.26	26.33
10	29.43	29.25	33.1	32.34	29.36	26.65	26.15	30.01	26.99	28.53	28.52
11	30.95	29.55	34.62	32.01	29.12	27.67	26.32	30	25.6	28.88	28.45
Fig.6 C
	HFD-CN					HFD-PD1 antibody
1	7.946	8.159	7.384	11.348	9.378	8.184	9.35	8.602	7.175	8.156	7.387
2	7.597	7.464	7.137	9.675	7.997	7.436	9.208	8.212	6.3	8.287	6.326
3	6.757	7.885	7.498	9.068	8.016	5.829	9.578	9.319	6.233	8.982	6.648
4	5.726	7.523	7.146	8.977	9.414	6.491	8.696	8.751	6.02	8.174	6.597
5	12.031	12.688	14.037	17.582	15.917	9.936	11.024	14.331	10.492	11.435	12.258
6	14.25	10.233	15.968	18.556	15.835	10.791	11.292	14.463	9.724	12.398	11.547
7	15.81	13.436	22.293	23.555	17.539	12.782	12.749	19.515	13.189	14.209	14.035
8	17.505	16.315	21.765	24.891	19.529	14.677	11.531	17.432	13.161	14.977	14.674
9	21.995	19.821	24.378	23.722	19.474	18.285	13.237	18.661	12.451	15.891	16.844
10	25.365	22.438	30.218	27.885	23.113	22.274	16.034	23.685	14.454	20.666	22.998
11	27.683	23.316	31.291	28.132	21.343	24.012	17.021	24.19	12.781	19.702	21.905
Fig.6 E
HFD-CN	0.0374296	0.0284787	0.0356707	0.0325983	0.0264475
HFD-PD1 antibody	0.0204454	0.0232468	0.0200551	0.0245148	0.0128825	0.0228758
Fig.6 G
HFD-CN	0.0476979	0.0414564	0.0557927	0.0363565	0.0472995
HFD-PD1 antibody	0.0350493	0.0371949	0.0275265	0.0229469	0.0348584	0.0376324
Fig.6 J
HFD-CN	230.141	233.088	263.308	243.779	233.662
HFD-PD1 antibody	200.057	209.319	198.103	187.621	163.689	210.773
Fig.6 K	HFD-CN						HFD-PD1 inhibitor
Ampkα1	0.941388	0.825226	1.52929	0.903039	1.53993	0.261134	2.11823	1.69685	5.62893	10.95	6.83462	4.14928
Cpt1	1.387	1.31219	1.19083	0.727981	1.05846	0.32353	1.03668	1.07324	7.73806	12.8347	7.73806	5.94622
Acc1	1.17444	0.748445	1.19911	0.785655	1.34907	0.743275	2.50007	2.23763	2.07336	3.92303	3.43895	1.23283
Atgl	0.954667	1.24235	1.0303	0.80836	0.836867	1.12745	1.00213	0.896931	1.48769	0.90317	1.80634	1.33152
Fig.6 L
HFD-CN	3.2739	1.90786	0.990416	3.6439	5.25465
HFD-PD1 antibody	5.5591	7.68321	3.4953	5.38186	5.35029
